# Supplementary material for: Decoding the regulatory mechanism of glucose and insulin induced phosphatidylinositol 3,4,5-trisphosphate dynamics in β-cells
Source: Royal Society of Chemistry journal article supplement (doi:10.1039/c7mb00227k), 2017-06-01
Supplement: c7mb00227k1.zip [file c7mb00227k1.zip]

```

# glycopanROSIn.ode
#
# This file contains the program for a beta-cell model coupled to glycolysis.
# This was published by Bertram, Satin, Zhang, Smolen, and Sherman in
# Biophysical Journal, 87:3074-3087, November, 2004.
# This is further modified to include the effect of Glucose and insulin induced
# PIP3 activation in MIN6-beta cells (Effect of ROS signalling and Ca2+ independent
# glucose induced insulin activation are further incorporated)
# The modification was performed by Tagari Samanta, Peeyush Sharma, Dwijendra Kukri and Sandip Kar

# State variables:

# V      -- membrane potential
# n      -- activation of delayed rectifier
# Ca      -- free cytosolic calcium concentration
# ADP     -- cytosolic ADP concentration
# Caer    -- concentration of free calcium in the endoplasmic reticulum
# G6P     -- glucose 6-phosphate concentration
# FBP     -- fructose 1,6-bisphosphate concentration
# IEND    -- endogenous insulin concentration
# LCCOA   -- Long Chain Fatty Acid-Co-enzyme A concentration
# FFAex   -- external Free fatty acid concentration
# IRSact  -- concentration of the active form of insulin receptor substrate
# ROS     -- reactive oxygen species concentration
# PI3Kact -- phosphoinositide 3'-OH-kinase concentration
# PIP35   -- concentration of the free Phosphatidylinositol-3,5-bisphosphate
# PIP34   -- concentration of the free Phosphatidylinositol-3,4-bisphosphate
# PIP3    -- free Phosphatidylinositol-3,4,5-trisphosphate concentration
# GfPAktPI3 -- amount of GFP-PHakt complexed with membrane bound PIP3

# Initial conditions:

V(0)=-60
n(0)=0
Ca(0)=0.1
ADP(0)=732.05
Caer(0)=185
G6P(0)=200
FBP(0)=40
IEND(0)=0
LCCOA(0)=0
FFAex(0)=0
IRSact(0)=0
ROS(0)=0
PI3Kact(0)=0
PIP35(0)=0
PIP34(0)=0
PIP3(0)=0
GfPAktPI3(0)=0

# Parameter sets for various behaviors (use File/Get Set to select):
#
set compound {R_GK=0.2,gKATPbar=25000 gKCabar=600, k_gamma=10}
set slow {R_GK=0.2, gKATPbar=27000, gKCabar=100, k_gamma=10}
set fast {R_GK=0.4, gKATPbar=25000, gKCabar=600, k_gamma=10}
set subthresh {R_GK=0.2, gKATPbar=30000, gKCabar=100, k_gamma=10}
set accordion {R_GK=0.2, gKATPbar=23000, gKCabar=600, k_gamma=10}

# -----
# Channel properties:

num Cm=5300

par VK=-75
num gK=2700, taun=20
ninf = 1/(1+exp(-(16+V)/5))

par gCa=1000, VCa=25
minf = 1/(1+exp(-(20+V)/12))

par gKCabar=600
num Kd=0.5

# Ionic currents:

# IK
Ik = gK*n*(V-VK)

# ICa
ICa = gCa*minf*(V-VCa)

# IKCa
gKCa = gKCabar/(1+(Kd/Ca)^2)
IKCa = gKCa*(V-VK)

# IKATP (see below, after calculation of nucleotide concentrations)
par gKATPbar=25000

# Calcium Handling
par alpha=4.50e-6, kPMCA=0.2, fcyt=0.01, fer=0.01

# sigmav=cyt volume/ER volume = V_cyt/V_er
num pleak=0.0002, sigmav=31
num kSERCA=0.4
Jmem = -(alpha*Ica + kPMCA*Ca)
JSERCA = kSERCA*Ca
Jleak = (pleak*(Caer - Ca))
Jer = Jleak - JSERCA

# -----
# Glycolytic and Keizer-Magnus components

# Parameters:

# R_GK--glucokinase rate
# Atot--total adenine nucleotide concentration (micromolar)
# K1--Kd for AMP binding
# K2--Kd for FBP binding
# K3--Kd for F6P binding
# K4--Kd for ATP binding
# famp, etc--Kd amplification factors for heterotropic binding
# famp corresponds to f13 in paper
# fmt corresponds to f41
# ffbp corresponds to f23
# fbt corresponds to f42
# fatp corresponds to f43
# R_GPDH--glyceraldehyde phosphate dehydrogenase rate

# Glycolytic parameters:
num K1=30, K2=1, K3=50000, K4=1000
num famp=0.02, fmt=20, ffbp=0.2, fbt=20, fatp=20

# Glycolytic expressions

```

```

F6P = 0.3*G6P

# nucleotide concentrations used for R_PFK
num Atot=3000
rad = sqrt((ADP-Atot)^2-4*ADP^2)
ATP = 0.5*(Atot-ADP+rad)
AMP = ADP^2/ATP

# Iterative calculation of R_PFK (cf. Smolen95, Eq. 12)
# alpha=1 --- AMP bound
# beta=1 --- FBP bound
# gamma=1 --- F6P bound
# delta=1 --- ATP bound

# (alpha,beta,gamma,delta)
# (0,0,0,0)
weight1=1
topa1=0
bottom1=1

# (0,0,0,1)
weight2=ATP^2/K4
topa2=topa1
bottom2=bottom1+weight2

# (0,0,1,0)
weight3=F6P^2/K3
topa3=topa2+weight3
bottom3=bottom2+weight3

# (0,0,1,1)
weight4=(F6P*ATP)^2/(fatp*K3*K4)
topa4=topa3+weight4
bottom4=bottom3+weight4

# (0,1,0,0)
weight5=FBP/K2
topa5=topa4
bottom5=bottom4+weight5

# (0,1,0,1)
weight6=(FBP*ATP^2)/(K2*K4*fbt)
topa6=topa5
bottom6=bottom5+weight6

# (0,1,1,0)
weight7=(FBP*F6P^2)/(K2*K3*ffbp)
topa7=topa6+weight7
bottom7=bottom6+weight7

# (0,1,1,1)
weight8=(FBP*F6P^2*ATP^2)/(K2*K3*K4*ffbp*fbt*fatp)
topa8=topa7+weight8
bottom8=bottom7+weight8

# (1,0,0,0)
weight9=AMP/K1
topa9=topa8
bottom9=bottom8+weight9

# (1,0,0,1)
weight10=(AMP*ATP^2)/(K1*K4*fmt)
topa10=topa9
bottom10=bottom9+weight10

# (1,0,1,0)
weight11=(AMP*F6P^2)/(K1*K3*famp)
topa11=topa10+weight11
bottom11=bottom10+weight11

# (1,0,1,1)
weight12=(AMP*F6P^2*ATP^2)/(K1*K3*K4*famp*fmt*fatp)
topa12=topa11+weight12
bottom12=bottom11+weight12

# (1,1,0,0)
weight13=(AMP*FBP)/(K1*K2)
topa13=topa12
bottom13=bottom12+weight13

# (1,1,0,1)
weight14=(AMP*FBP*ATP^2)/(K1*K2*K4*fbt*fmt)
topa14=topa13
bottom14=bottom13+weight14

# (1,1,1,0) --- the most active state of the enzyme
weight15=(AMP*FBP*F6P^2)/(K1*K2*K3*ffbp*famp*fbt*fmt*fatp)
topa15=topa14
topb=weight15
bottom15=bottom14+weight15

# (1,1,1,1)
weight16=(AMP*FBP*F6P^2*ATP^2)/(K1*K2*K3*K4*ffbp*famp*fbt*fmt*fatp)
topa16=topa15+weight16
bottom16=bottom15+weight16

# Phosphofructokinase rate:

# lambda, Vmax as in Smolen95, Eq. 3
num lambda=0.06, Vmax=2
R_PFK=Vmax*(lambda*topa16 + topb)/bottom16

# GPDH flux:
R_GPDH = 0.2*sqrt(FBP)

# KATP channel
num Kdd=17, Ktd=26, Ktt=1

% KATP channel open probability (cf. Magnus and Keizer, 1998)
mgADP = 0.165*ADP
ADP3m = 0.135*ADP
ATP4m = 0.05*ATP
topo = 0.08*(1+2*mgADP/Kdd) + 0.89*(mgADP/Kdd)^2
bottomo = (1+mgADP/Kdd)^2 * (1+ADP3m/Ktd+ATP4m/Ktt)
oinf = topo/bottomo
gKATP = gKATPbar*oinf
IKATP = gKATP*(V-VK)

# glycolytic input to mitochondrial ADP equation:
num k_gamma=10
num v_gamma=2.2

```

```

gamma = v_gamma*(R_GPDH/(k_gamma+R_GPDH))

num r=1
par taua=300000, r1=0.35

# conversion parameter for glycolytic subsystem
# kappa erroneously called lambda in paper; renamed kappa for
# consistency with Smolen, JTB, 1995 and Pedersen et al, 2005.
num kappa=0.005

# -----

#glucokinase rate(Modified by Samanta et al.):

R_GK=G0^2/(G0^2+k^2)
par G0=3, k=23.2

# -----
# parameters for LCCoA:
par kfactor=0.02000206, kdis1=1.0, ki=0.23545

# parameters for FFAex:
par ka=0.01, kb=0.00005, kc=600, FFAtotal=1

# parameters for Iend:
par kIfor=7, kIcon=0.01, klccoA=0.00018, kint=0.000125, kfor=0.9826

# parameters for IRSact:
par kfor1=0.015, krev1=0.5, IRStotal=1, kmi=0.001, Iex=0

# parameters for ROS:
par kros=0.0165, kdros=1.1, km=0.0035, krca=0.11, kca=0.01

# parameters for PI3Kact:
par kfor2=0.00055, krev2=0.00495, PI3Ktotal=3, Ly=0

# parameters for PIP35:
par kpip35=0.00000055, kdpip35=0.0000055

# parameters for PIP34:
par kpip34=0.00000055, kdpip34=0.0000055

# parameters for PIP3:
par kfor3=0.00275, krev3=0.00275, PIPtotal=1.0, kfor32=15, kr=2.3

# parameters for GfPAktPIP3:
par kfor4=0.0033, krev4=0.0000275, GfPAkttot=1

# -----

# parameters for standardization and normalization:

par std_GAP=0.528664 std_Ca=0.0647858
par gf11=0.773280877 gf20=0.92073749

# -----

# Differential equations:

V' = -(IK + ICa + IKCa + IKATP)/Cm
n' = (ninf-n)/taun
Ca' = fcyt*(Jmem + Jer)
ADP' = (ATP-ADP)*exp((r + gamma)*(1-Ca/r1))/taua
Caer' = -fer*sigmav*Jer
G6P' = kappa*(R_GK - R_PFK)
FBP' = kappa*(R_PFK - 0.5*R_GPDH)

# -----
# Glucose and Insulin induced PIP3 activation components
# -----

LCCoA' = kfactor*(G0^2/(G0^2+ki^2)) - kdis1*LCCoA
FFAex' = ka*LCCoA*(FFAtotal-FFAex) - ((kb/(1+(kc*Ca)))*FFAex)

Iend' = ((kIfor*ca^6)/((kfor^6)+(ca^6))) - kIcon*Iend + klccoA*LCCoA + kint*(FFAtotal-FFAex)

IRSact' = kfor1*(IRStotal-IRSact)*((Iend+Iex)^2)/((kmi^2+(Iend+Iex)^2) - krev1*IRSact

ROS' = ((kros*G0^2*(Iend+Iex)^2)/((km^2+(Iend+Iex)^2) + ((krca*Ca)/(1+kca*Ca^2))) - kdros*ROS

PI3Kact' = (kfor2*(PI3Ktotal-PI3Kact)*IRSact) - krev2*PI3Kact

PIP35' = kpip35*PIP3 - kdpip35*PIP35

PIP34' = kpip34*PIP3 - kdpip34*PIP34

PIP3' = (kfor3/(1+kfor32*Ly))*(PIPtotal-PIP35-PIP34-PIP3-GfPAktPIP3)*PI3Kact \
- ((krev3/(1+kr*(1.0/(1.0+kfor32*Ly)))*ROS))*PIP3 - kpip35*PIP3 + kdpip35*PIP35 \
- kpip34*PIP3 + kdpip34*PIP34 - kfor4*(GfPAkttot-GfPAktPIP3)*PIP3 + krev4*GfPAktPIP3

GfPAktPIP3' = kfor4*(GfPAkttot-GfPAktPIP3)*PIP3 - krev4*GfPAktPIP3

# -----
@ meth=cvode, toler=1.0e-10, atol=1.0e-10, dt=20, transient=0, total=1800000
@ maxstor=100000,bounds=10000000, xp=tmin, yp=V
@ xlo=0, xhi=10, ylo=-70, yhi=10

# -----

# Auxiliary variables defined for ease of plotting and scaled variables:

# -----

aux tsec=t/1000
aux tmin=t/60000
aux tshift2=2+t/60000
aux tshift3=3+t/60000
aux tshift4=4+t/60000
aux tshift6=6+t/60000
aux tshift7=7+t/60000
aux tshift8=8+t/60000
aux tshift9=9+t/60000
aux tshift10=10+t/60000
aux tshift12=12+t/60000
aux tshift22=22+t/60000
aux rf=(GfPAktPIP3-std_GAP)/std_GAP
aux rcalevel=(Ca-std_Ca)/std_Ca
aux GfPAktPIP31=(GfPAktPIP3*100)/gf11
aux Gfpahtip32=(GfPAktPIP3*100)/gf20
aux Iendstd=Iend/0.00049369

done

```
